# Supplementary material for: Spin dynamics and inverse spin Hall effect study in the metallic Pt/NiMn/CoFeB system
Source: Royal Society of Chemistry journal article supplement (doi:10.1039/d2cp01857h), 2022-01-01
Supplement: d2cp01857h2.pdf [file d2cp01857h2.pdf]

## Supplementary Information

### Spin dynamics and inverse spin Hall effect study in metallic Pt/NiMn/CoFeB system

Koustuv Roy<sup>a</sup>, Sagarika Nayak<sup>a</sup>, Pushpendra Gupta<sup>a</sup>, and Subhankar Bedanta<sup>a,b,\*</sup>

<sup>a</sup>Laboratory for Nanomagnetism and Magnetic Materials (LNMM), School of Physical Sciences,  
National Institute of Science Education and Research (NISER),

An OCC of Homi Bhabha National Institute (HBNI), Jatni 752050, Odisha, India

<sup>b</sup>Center for Interdisciplinary Sciences (CIS), National Institute of Science Education and Research (NISER),  
An OCC of Homi Bhabha National Institute (HBNI), Jatni, 752050 India

Fig. A1 shows the typical FMR spectra measured at 32 mW rf power of sample S2 and its corresponding fits with the Lorentzian equation 1 of the main manuscript.

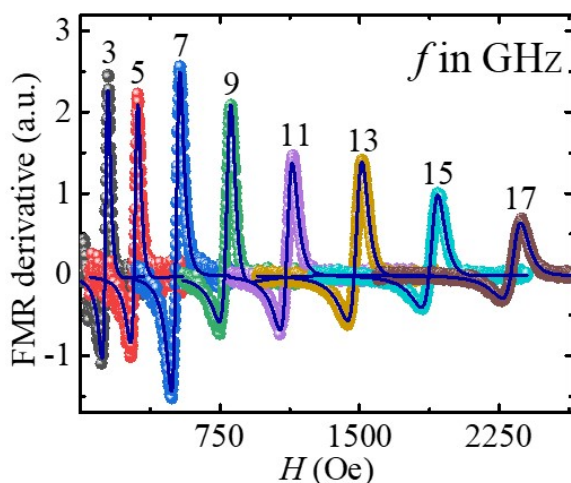

Figure A1: Typical FMR spectra measured at 32 mW rf power of sample S2 and its corresponding fits with the Lorentzian equation.

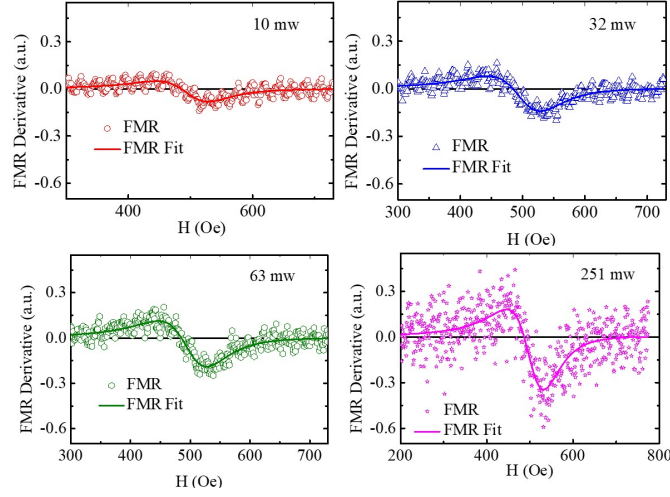

Figure A2: Typical FMR spectra and its corresponding fits with the Lorentzian equation at different rf power of sample S2

Table 1: Fitting parameters obtained with fitting Fig. A2 with Lorentzian function

| $rf$ power (mW) | $\Delta H$ (Oe) | $H_{res}$ (Oe)  |
|-----------------|-----------------|-----------------|
| 10              | $140.4 \pm 5.9$ | $500.2 \pm 12$  |
| 32              | $140.6 \pm 6.2$ | $501.1 \pm 8.2$ |
| 63              | $139.5 \pm 5.5$ | $500.8 \pm 5.5$ |
| 251             | $141.1 \pm 6.3$ | $499.8 \pm 5.8$ |

Fig.A2 shows the FMR spectra and its corresponding fitting of sample S2 at different applied rf power. It is clearly visible that the amplitude of the FMR spectra increases with the applied rf power. However, the obtained  $H_{res}$  and  $\Delta H$  values are almost same for all powers which is listed in table 1.
